# Supplementary material
Source: Research Square preprint supplement (doi:10.21203/rs.3.rs-9345189/v1)
Supplement: Supplementary file 1 [file 6b6710a536db2d0c8ea3f9a5.docx]

**Appendix 1 – Survey questions**

1. Gender
   1. Male
   2. Female
   3. Prefer not to say
2. Age
   1. 18-25
   2. 26-40
   3. 41-55
   4. Over 55
   5. Prefer not to say
3. Please specify the primary organisation you work for?
   1. Aneurin Bevan University Health Board
   2. Betsi Cadwaldar University Health Board
   3. Cardiff and the Vale University Health Board
   4. Cwm Taf Morgannwg University Health Board
   5. Hywel Dda University Health Board
   6. Powys Teaching Health Board
   7. Velindre University NHS Trust
   8. Public Health Wales
   9. National Imaging Academy Wales
   10. Prefer not to say
4. Please specify your primary role within the NHS Wales:
   1. Radiologist
   2. Radiographer
   3. Senior/Executive Manager
   4. Service/Directorate Manager
   5. Administrative/Clerical
   6. Project Manager
   7. Digital/Technical
   8. Finance
   9. Other, please specify

1. How long have you worked within the NHS?
   1. 1-5 years
   2. 6-10 years
   3. 10 years +
2. Have you previously been involved in an implementation of a digital project in the NHS within the past 5 years ?
   1. Yes (goto Q7)
   2. No (goto Q8)
3. If your answer to Q6 was yes, was this project a success in terms of (*if you have been involved in multiple digital projects, please choose the most recent project or one that you have been more involved with*)
   1. Was it on budget: yes/no
   2. Was it delivered to the agreed timescales: yes/no
   3. Were the benefits realised: yes/no

Please provide any further comments _____

1. Have you previously been involved in a PACS implementation?
   1. Yes
   2. No
2. Please rate the benefits below of replacing the current PACS system with the new PACS system on a scale of 1. most – 5. least important, for the role you are currently in
   1. Improved workflow
   2. More efficient and will free up time
   3. Cost saving
   4. Sharing of information and data across boundaries
   5. Improved security
   6. Improve patient care
   7. Enhanced diagnostic accuracy
   8. Other please state
3. Please rate the barriers to implementing the new PACS system below on a scale of 1. most – 5. least important, for the role you are currently in
   1. Local staff resources
   2. Training
   3. Data migration
   4. Interoperability with existing systems
   5. Complexity of implementing RIS systems simultaneously
   6. Cyber security
   7. Cost
   8. Other
4. Please rate the solutions to overcoming the barriers below, on a scale of 1. most – 5. least important, for the role you are currently in
   1. Communication and engagement with new supplier
   2. Clear implementation plans
   3. Training plan
   4. Engagement with clinicians
   5. Ensure accessibility of system throughout a hospital
   6. Effective change management
5. Please rate the critical success factors below on a scale of 1. most – 5. least important, for successfully implementing a new PACS in Wales?
   1. Funding to support implementation
   2. National coordination of the implementation
   3. Having the right supplier deliver the service
   4. IT infrastructure
   5. Clinical leadership
   6. Partnership approach with all Trusts and Health Boards
6. Do you believe that the new PACS system will be implemented within the agreed timescales in Wales ?
   1. Yes
   2. No
   3. If No, please explain why
7. Do you have any additional comments or feedback you would like to make?

Thank you for taking the time to complete this questionnaire. Your input is valuable in understanding the benefits and challenges of implementing a PACS in healthcare environments
